# Supplementary material
Source: PubMed Central journal article supplement (PMC2084274)

NPV of costs as % of NPV GDP (2005-2100)

a

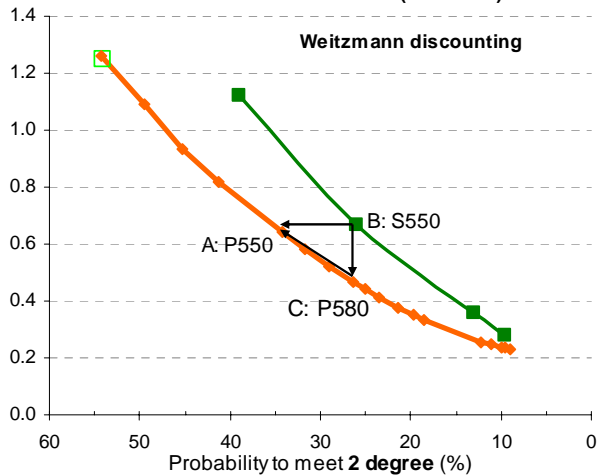

NPV of costs as % of NPV GDP (2005-2150)

b

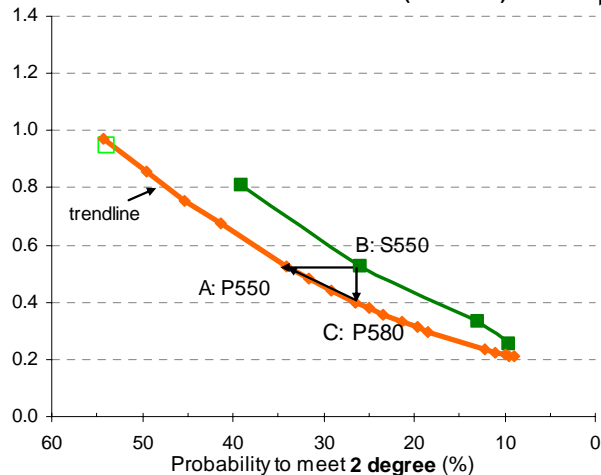

NPV of costs as % of NPV GDP (2005-2100)

c

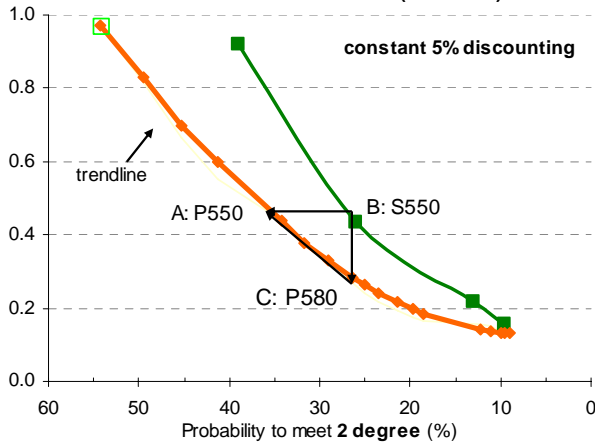

NPV of costs as % of NPV GDP (2005-2150)

d

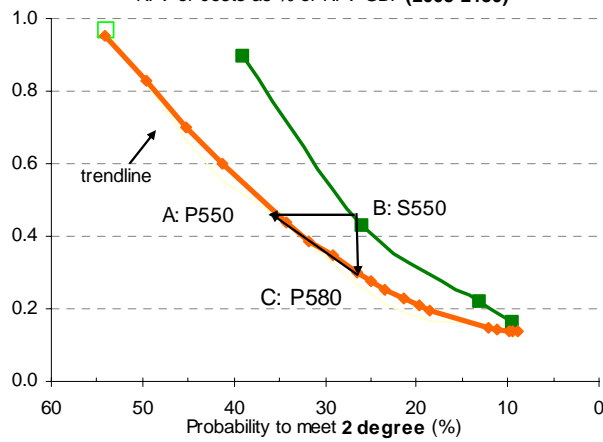

Supplement: pnas_0701598104_3.pdf [file pnas_0701598104_3.pdf]
