# Supplementary material
Source: PubMed Central journal article supplement (PMC2084274)

Discount rates over time

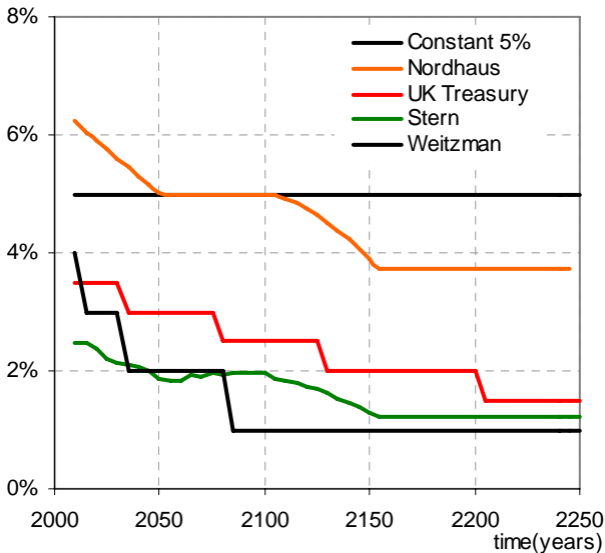

Supplement: pnas_0701598104_1.pdf [file pnas_0701598104_1.pdf]

NPV of abatement costs (Trillion US\$) **a**

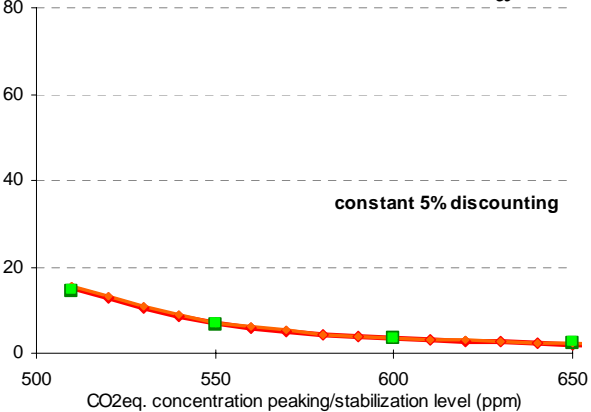

NPV of abatement costs (Trillion US\$) **b**

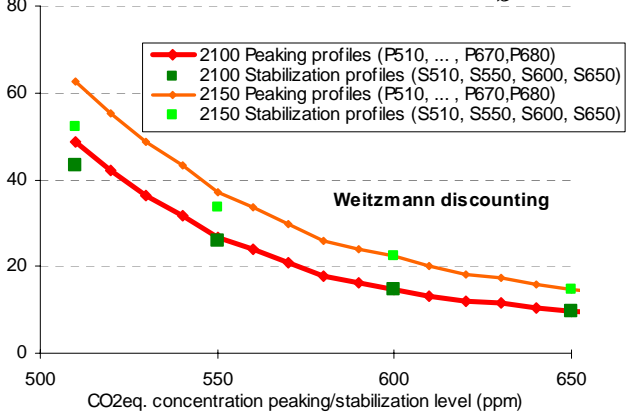

Supplement: pnas_0701598104_2.pdf [file pnas_0701598104_2.pdf]

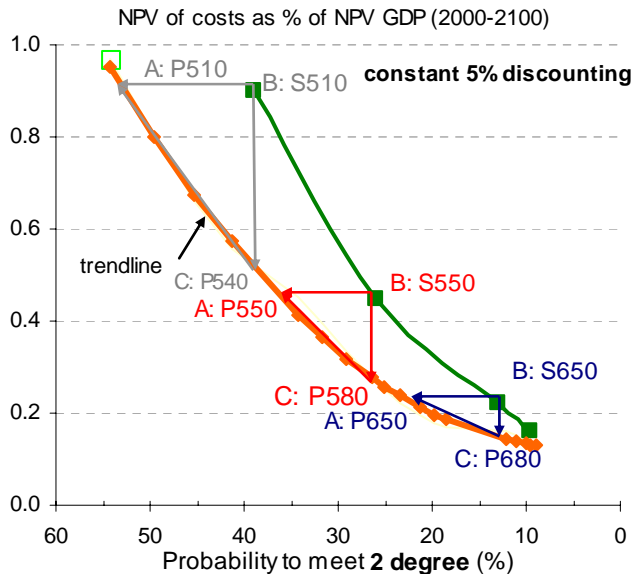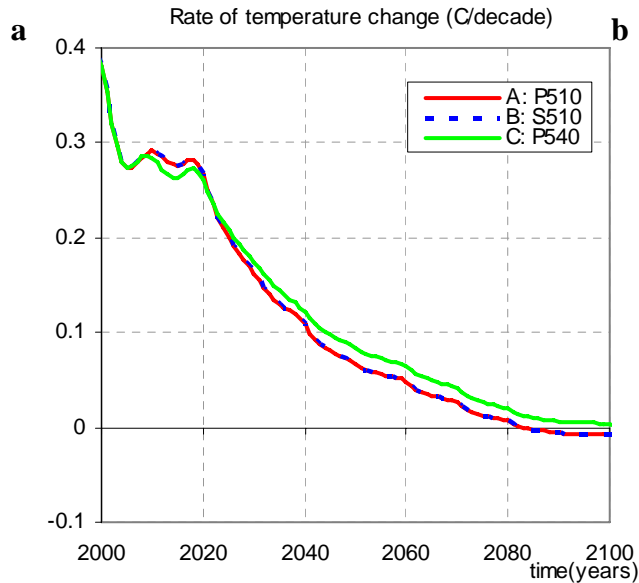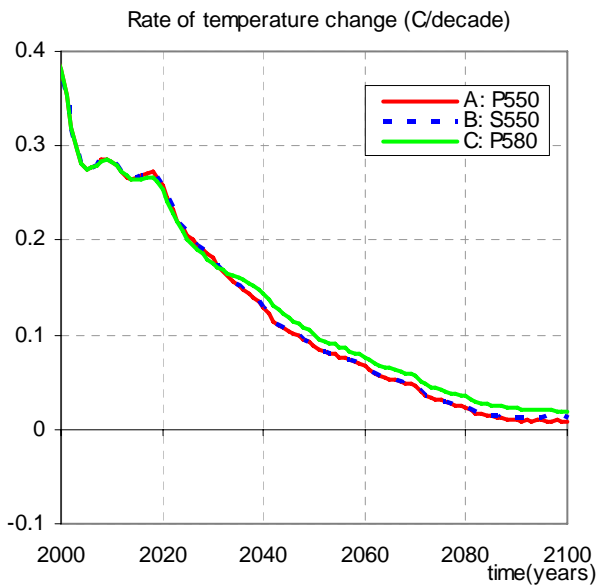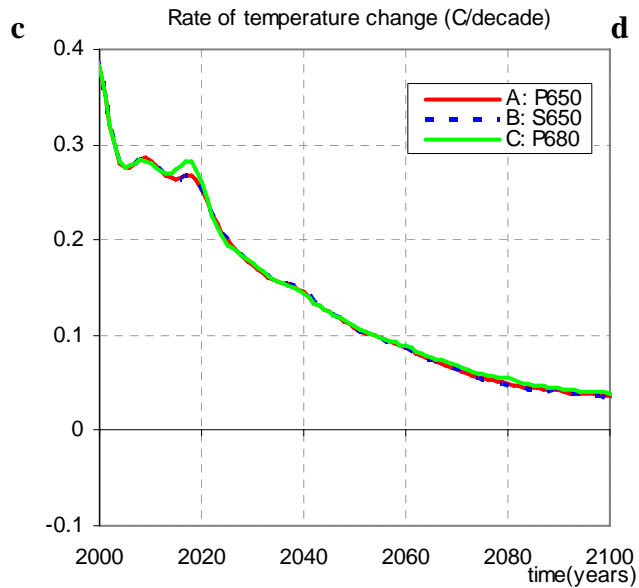

Supplement: pnas_0701598104_4.pdf [file pnas_0701598104_4.pdf]
